# Supplementary material for: NMI inhibits cancer stem cell traits by downregulating hTERT in breast cancer
Source: PubMed Central journal article supplement (PMC5520720; doi:10.1038/cddis.2017.200), 2017-05-11

# Supplementary Figure 1

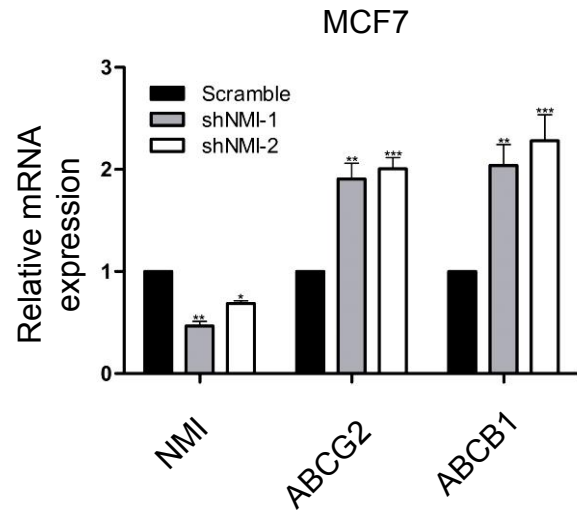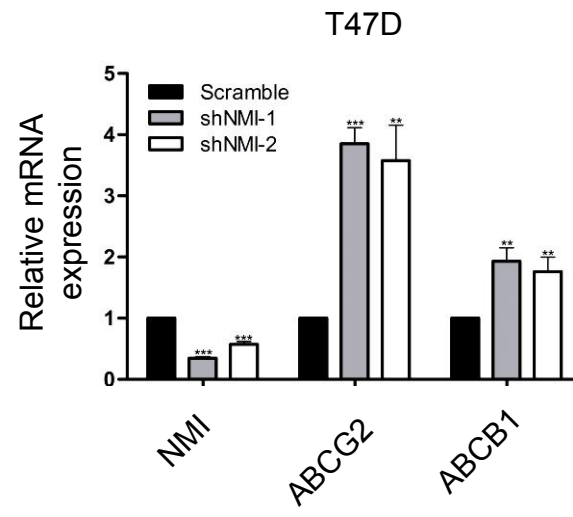

Supplementary Figure 2

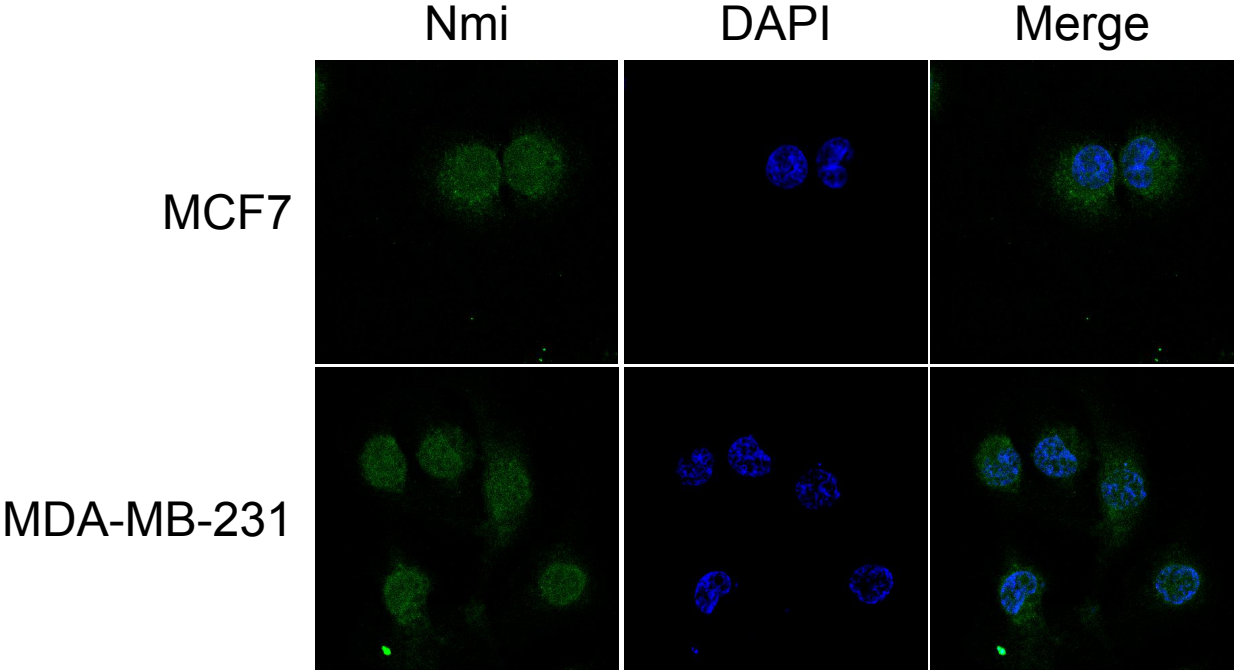

Supplement: cddis2017200x1.pdf [file cddis2017200x1.pdf]
